# Supplementary material
Source: PubMed Central journal article supplement (PMC4877267)

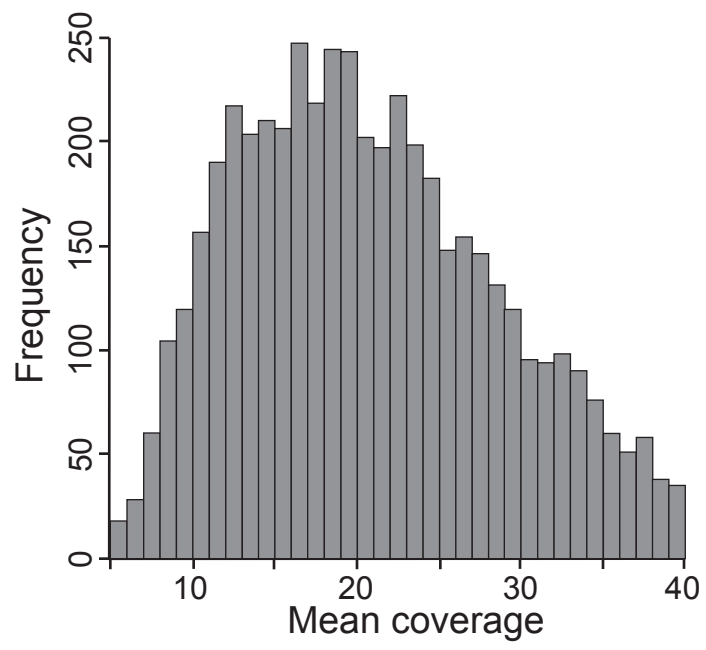

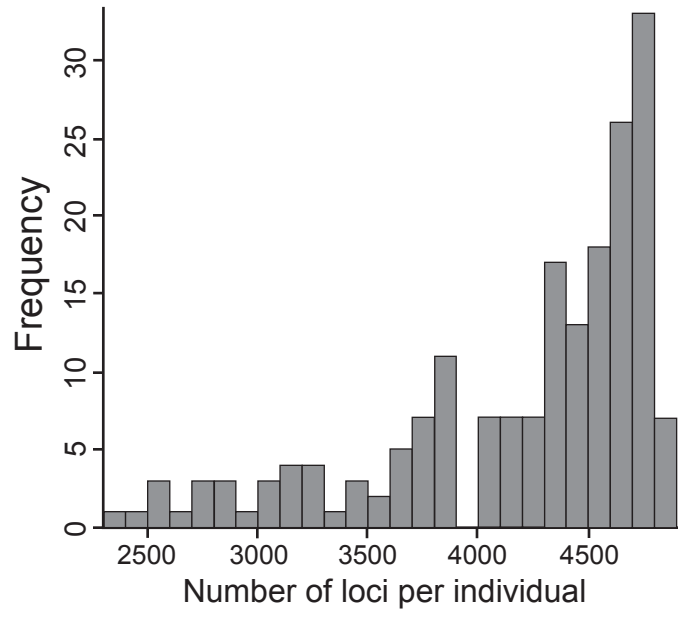

(a) Highest 5%  $F_{ST}$  values, non-outlier loci

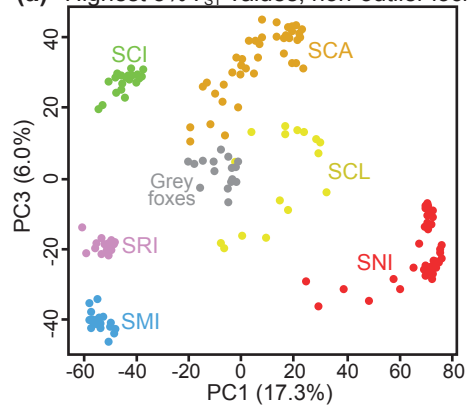

(b) Highest 5%  $F_{ST}$  values, outlier loci

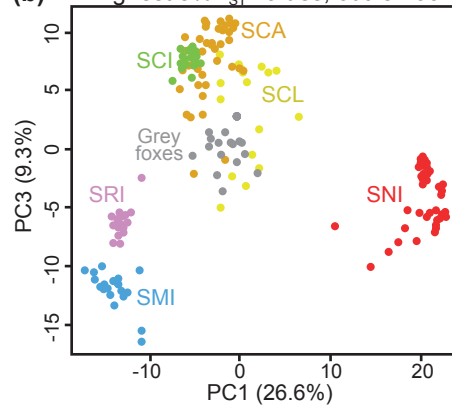

(c) FDIST2, non-outlier loci

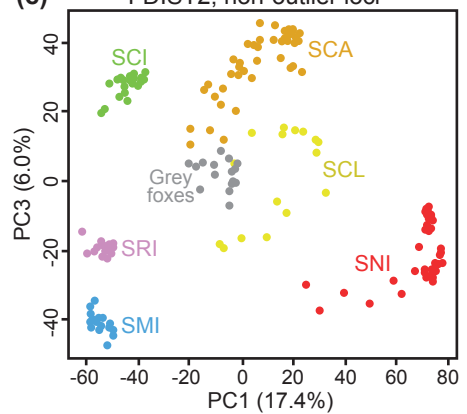

(d) FDIST2, outlier loci

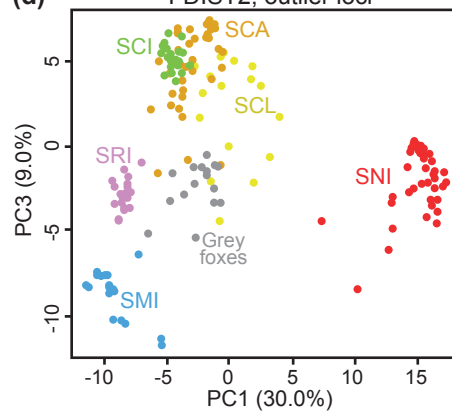

(e) FDIST2 (FDR), non-outlier loci

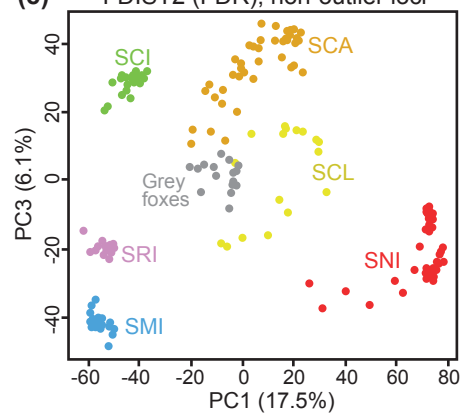

(f) FDIST2 (FDR), outlier loci

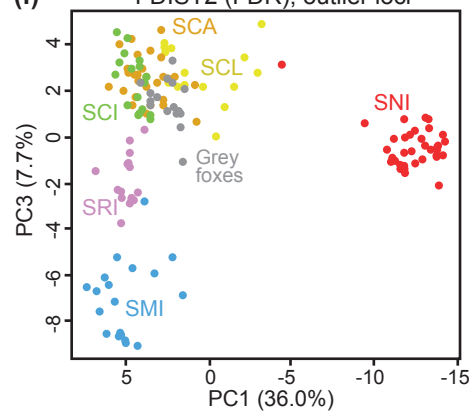

(g) Bayesfst, non-outlier loci

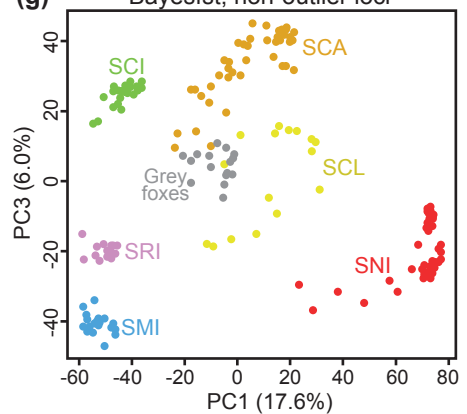

(h) Bayesfst, outlier loci

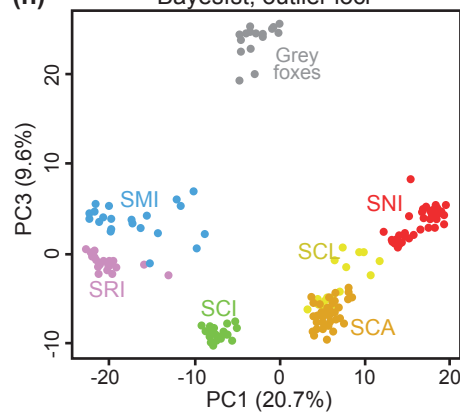

(a) Highest 5%  $F_{ST}$  values, non-outlier loci

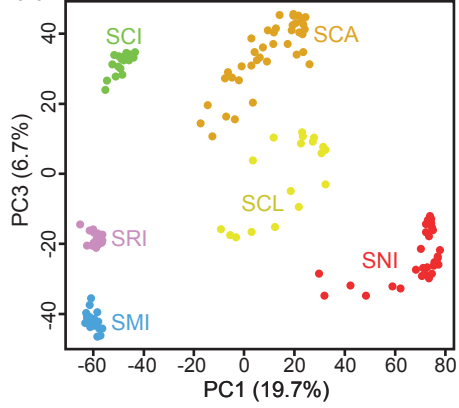

(b) Highest 5%  $F_{ST}$  values, outlier loci

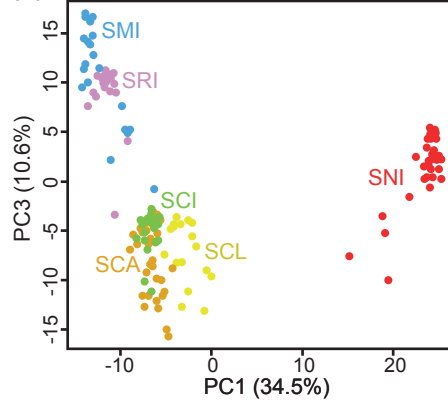

(c) FDIST2, non-outlier loci

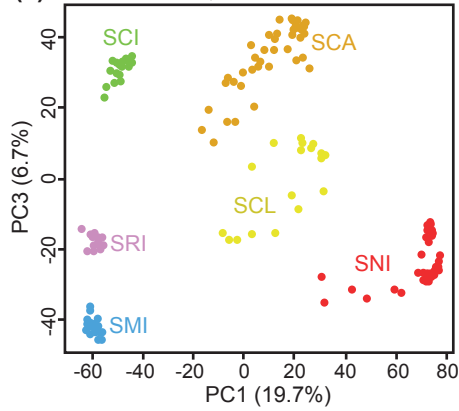

(d) FDIST2, outlier loci

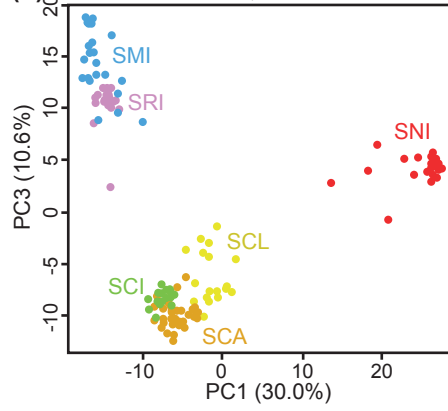

(e) FDIST2 (FDR), non-outlier loci

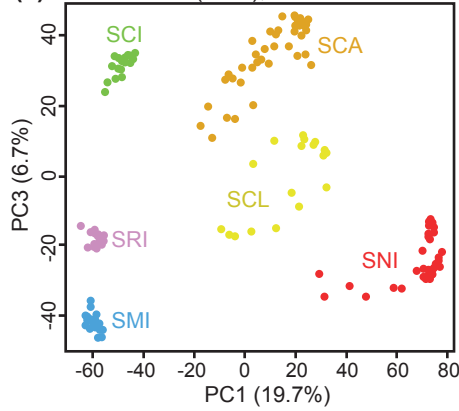

(f) FDIST2 (FDR), outlier loci

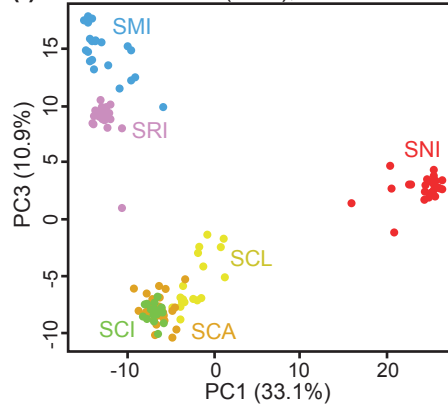

(g) Bayesfst, non-outlier loci

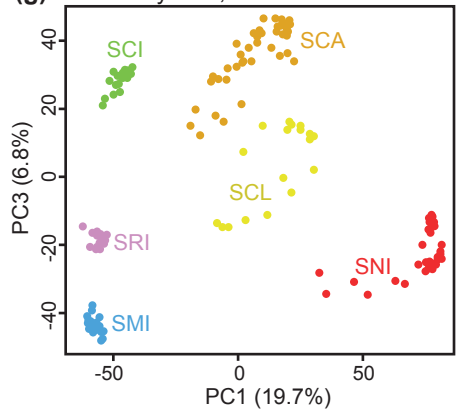

(h) Bayesfst, outlier loci

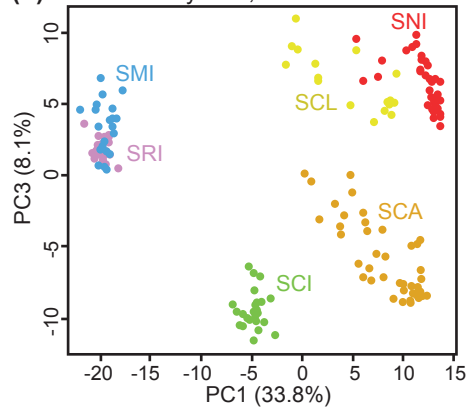

**(a)** Highest 5%  $F_{ST}$  values  
Non-outlier loci

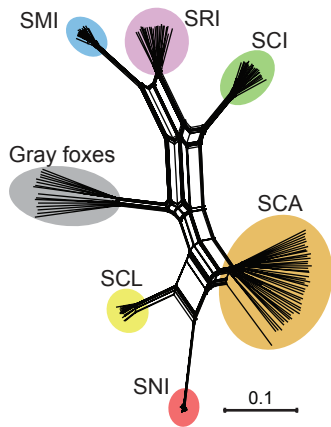

**(b)** FDIST2  
Non-outlier loci

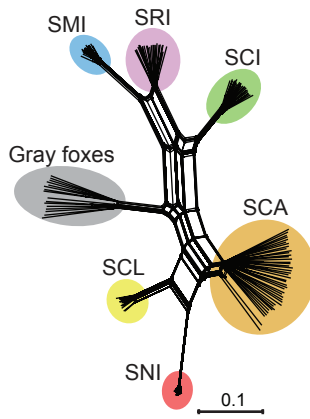

**(c)** FDIST2 (FDR)  
Non-outlier loci

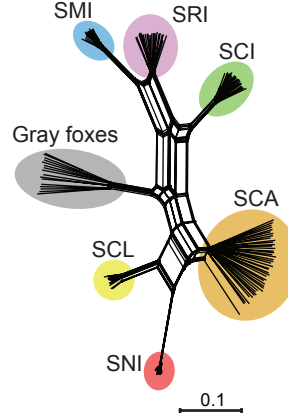

**(d)** Bayesfst  
Non-outlier loci

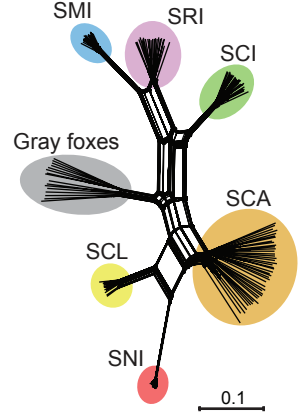

**(e)** Highest 5%  $F_{ST}$  values  
Outlier loci

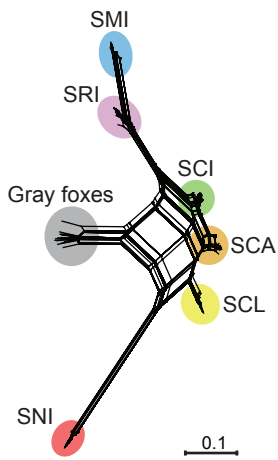

**(f)** FDIST2  
Outlier loci

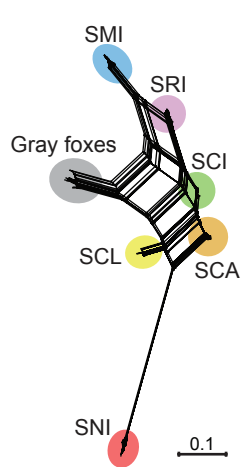

**(g)** FDIST2 (FDR)  
Outlier loci

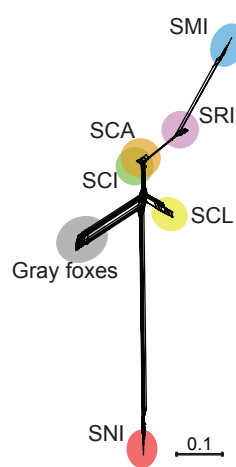

**(h)** Bayesfst  
Outlier loci

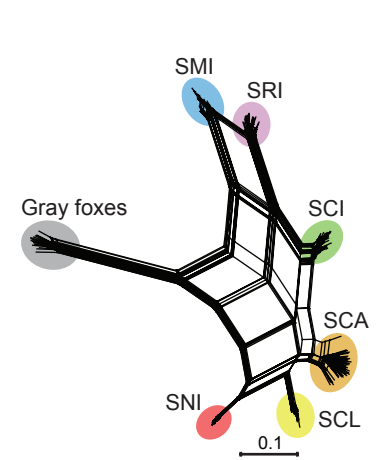

**(a)** Highest 5%  $F_{ST}$  values  
Non-outlier loci

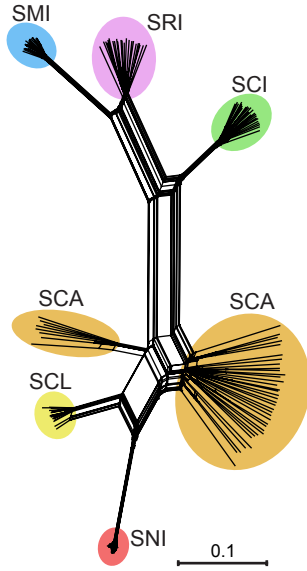

**(b)** FDIST2  
Non-outlier loci

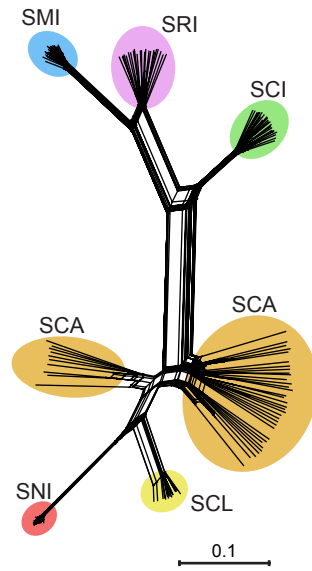

**(c)** FDIST2 (FDR)  
Non-outlier loci

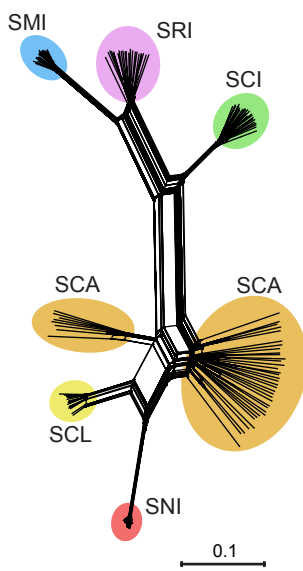

**(d)** Bayesfst  
Non-outlier loci

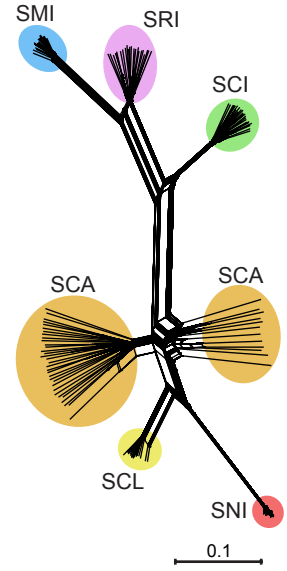

**(e)** Highest 5%  $F_{ST}$  values  
Outlier loci

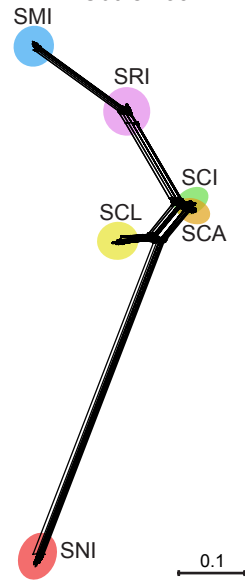

**(f)** FDIST2  
Outlier loci

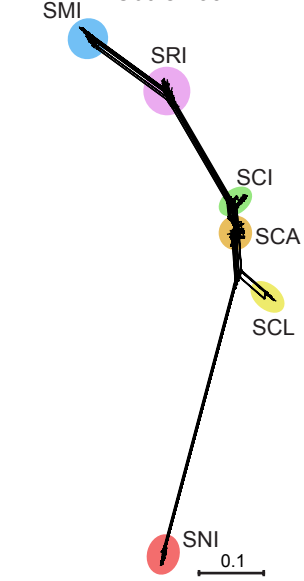

**(g)** FDIST2 (FDR)  
Outlier loci

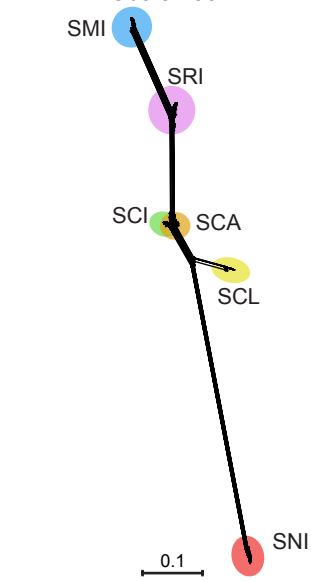

**(h)** Bayesfst  
Outlier loci

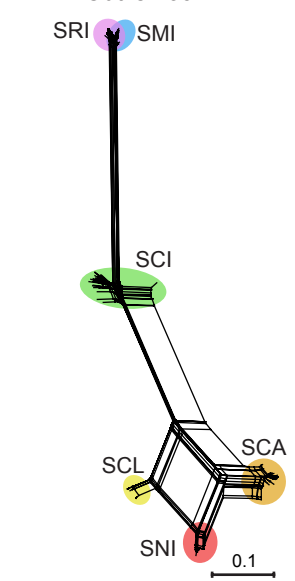

Supplement: NIHMS766785-supplement-Supp_Fig_S1-S6.pdf [file NIHMS766785-supplement-Supp_Fig_S1-S6.pdf]
